# Supplementary material for: Increased Institutional Surgical Experience in Robot-Assisted Radical Hysterectomy for Early Stage Cervical Cancer Reduces Recurrence Rate: Results from a Nationwide Study
Source: MDPI journal article supplement (doi:10.3390/jcm9113715), 2020-11-19
Supplement: s1 [file s1]

**Table A** Supplementary material. Number of robotic surgeries per hospital during the introduction of robot assisted radical hysterectomy (RRH) ( $\leq 50$  surgeries) and the experienced years ( $> 50$  surgeries). Rate of recurrence and tumor size in the cohort without Radio chemotherapy (RC-T) presented per hospital.

| University Hospital                                                                                 | Hospital 1 | Hospital 2 | Hospital 3 | Hospital 4     | Hospital 5     | Hospital 6     |
|-----------------------------------------------------------------------------------------------------|------------|------------|------------|----------------|----------------|----------------|
| Year of onset of RRH                                                                                | 2005       | 2009       | 2011       | 2010           | 2014           | 2014           |
| Average annual volume of RRH* during the years of introduction $\leq 50$ surgeries                  | 16         | 16         | 13         | 10             | 12             | 10             |
| Average annual volume of total robotic surgery during the years of introduction $\leq 50$ surgeries | 106        | 122        | 51         | 104            | 86             | 65             |
| Average annual volume of total robotic surgery during the experienced years $> 50$ surgeries        | 265        | 243        | 74         | -              | -              | -              |
| <b>RRH without RC-T</b>                                                                             |            |            |            |                |                |                |
| Recurrence rate introductory cohort $\leq 50$ surgeries                                             | 8.6%       | 20%        | 10%        | 10.5%          | 2.6%           | 3.6%           |
| Median tumor size introductory cohort $\leq 50$ surgeries                                           | 10         | 15         | 10.5       | 11.5           | 12.5           | 10.8           |
| Recurrence rate experienced cohort $> 50$ surgeries                                                 | 2.6%       | 5%         | 2.5%       | None performed | None performed | None performed |
| Median tumor size experienced cohort $> 50$ surgeries                                               | 10         | 10         | 9.5        |                |                |                |

\*does not include RRH for high risk histology cervical cancer or uterine stage II endometrial cancer.
